# Supplementary figures and images for: Widely distributed breeding populations of Canada warbler (Cardellina canadensis) converge on migration through Central America
Source: Springer Nature journal article supplement (doi:10.1186/s40850-020-00056-4), 2020-07-31

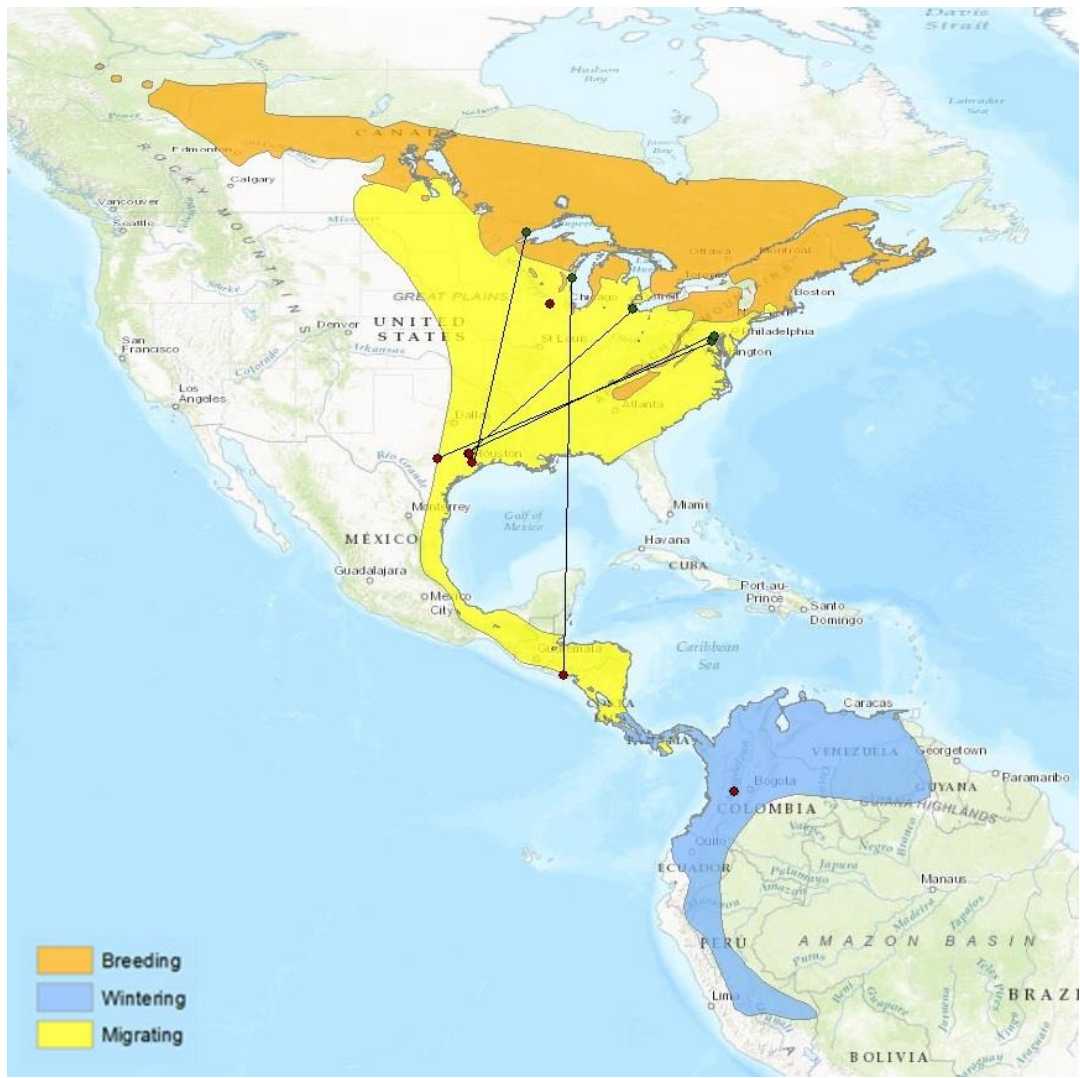

Supplement: MOESM3 [file 40850_2020_56_MOESM3_ESM.pdf]
